# Supplementary material for: Vaccination Status of Patients with Spinal Muscular Atrophy: A Multicentre Nationwide SMA-VACC Study
Source: Research Square preprint supplement (doi:10.21203/rs.3.rs-7594384/v1), 2025-11-20
Supplement: Supplementary file 1 [file 46673a68f2dcc3b564cdfdbc.docx]

**Supplementary File 1 Turkiye’s National Vaccination Schedule**

|  | At birth | 1st month | 2nd month | 4th month | 6th month | 12th month | 18th month | 24th month | 48th month | 13th year |
| --- | --- | --- | --- | --- | --- | --- | --- | --- | --- | --- |
| Hepatitis B | 1 | 2 |  |  | 3 |  |  |  |  |  |
| BCG |  | 1 |  |  |  |  |  |  |  |  |
| DTaP-Hib-IPV |  |  | 1 | 2 | 3 |  | R |  |  |  |
| PCV13 |  |  | 1 | 2 |  | R |  |  |  |  |
| MMR |  |  |  |  |  | 1 |  |  |  |  |
| DTaP-IPV |  |  |  |  |  |  |  |  | R |  |
| OPV |  |  |  |  | 1 |  | 2 |  |  |  |
| Varicella |  |  |  |  |  | 1 |  |  |  |  |
| Hepatitis A |  |  |  |  |  |  | 1 | 2 |  |  |
| Td |  |  |  |  |  |  |  |  |  | R |

Abbreviations:BCG Calmette−Guerin; DTaP-Hib-IPV, diphtheria, tetanus, pertussis, Haemophilus influenzae type B, inactivated poliovirus; PCV13, pneumococcal conjugate 13; MMR, measles, mumps, rubella; OPV, oral poliovirus; Td, tetanus, diphtheria.
